# Supplementary material for: Reusable ZIF-8@chitosan sponge for the efficient and selective removal of congo red
Source: Royal Society of Chemistry journal article supplement (doi:10.1039/d0nj02699a), 2020-01-01
Supplement: d0nj02699a1.pdf [file d0nj02699a1.pdf]

New Journal of Chemistry

## Supporting information

# Reusable ZIF-8@Chitosan Sponge for Efficiently Selective Removal of Congo Red

*Lijuan Liu,<sup>a</sup> Yu Ma,<sup>a</sup> Weiting Yang,<sup>a</sup> \* Chen Chen,<sup>b</sup> Meiling Li,<sup>a</sup> Duoyu Lin,<sup>a</sup> and  
Qinhe Pan<sup>a</sup> \**

<sup>a</sup> Laboratory of Advanced Materials of Tropical Island Resources, Ministry of  
Education, School of Science, Hainan University, Haikou, 570228, PR China

<sup>b</sup> Hainan Litree Purifying Technology Co. Ltd, Haikou, 510630, PR China

Email: [yangwt@hainanu.edu.cn](mailto:yangwt@hainanu.edu.cn); [panqinhe@163.com](mailto:panqinhe@163.com)

|                                 |                                                                                                           |                                                                                                             |
|---------------------------------|-----------------------------------------------------------------------------------------------------------|-------------------------------------------------------------------------------------------------------------|
| <p><b>Anionic<br/>dyes</b></p>  | 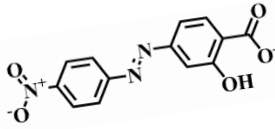<br>Alizarin Yellow (AY) | <br>Methyl Orange (MO)    |
|                                 | <br>Congo Red (CR)       |                                                                                                             |
| <p><b>Neutral<br/>dyes</b></p>  | <br>Dimethyl Yellow (DY) | <br>Sudan-1 (SD-1)        |
| <p><b>Cationic<br/>dyes</b></p> | <br>Rhodamine B (RhB)   | <br>Methylene Blue (MB) |

**Figure S1** Structures of organic dyes with different charges.

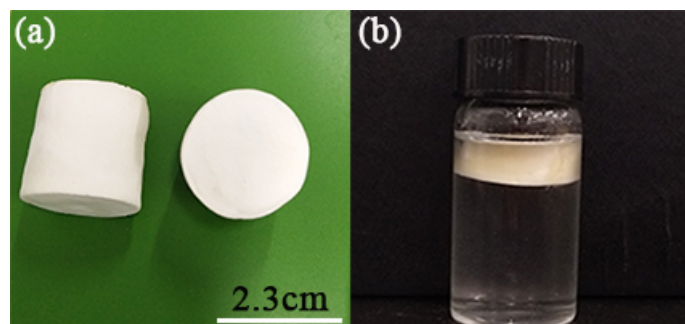

**Figure S2** (a) Digital photo of the ZIF-8@CS composite sponge; (b) Digital photo of ZIF-8@CS composite sponge placed in water.

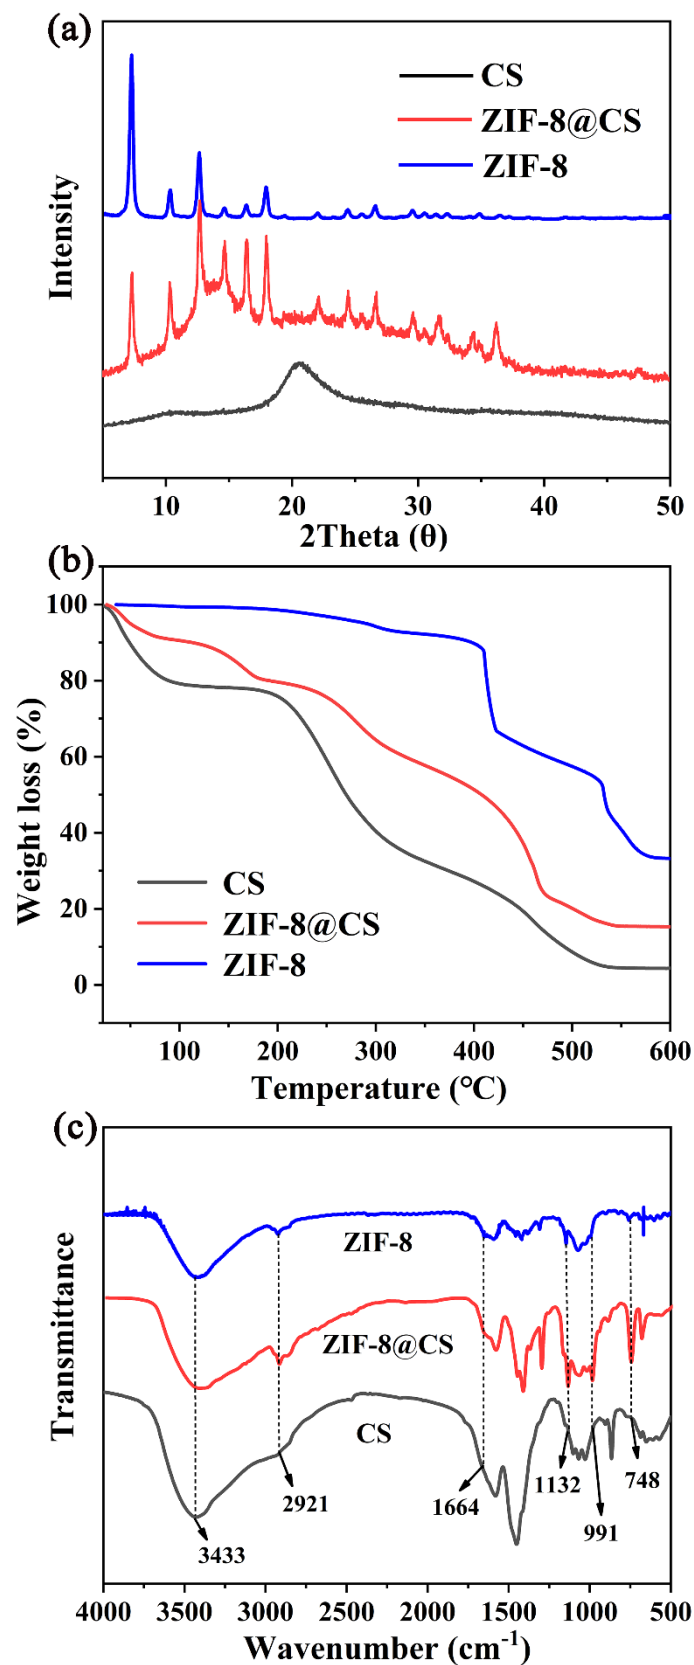

**Figure S3** (a) PXRD patterns, (b) TG curves and (c) FTIR spectra of CS, ZIF-8 and ZIF-8@CS sponges.

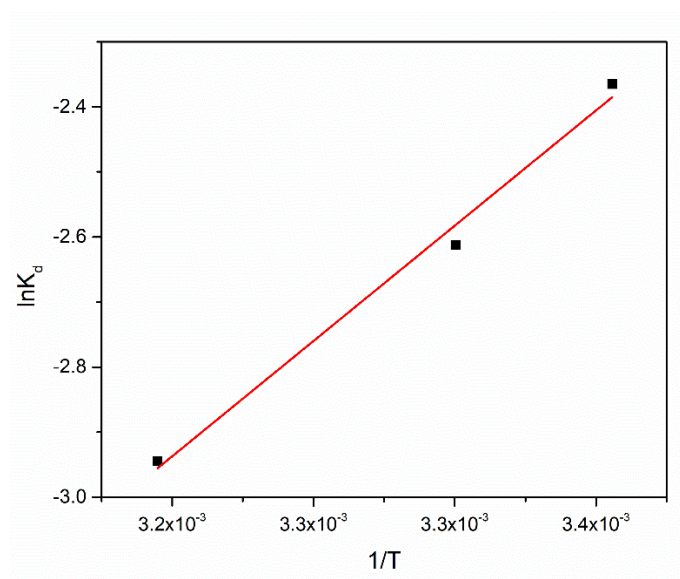

Figure S4 The influence of temperature on the CR sorption relationship curve between  $\ln K_d$  and  $1/T$ .

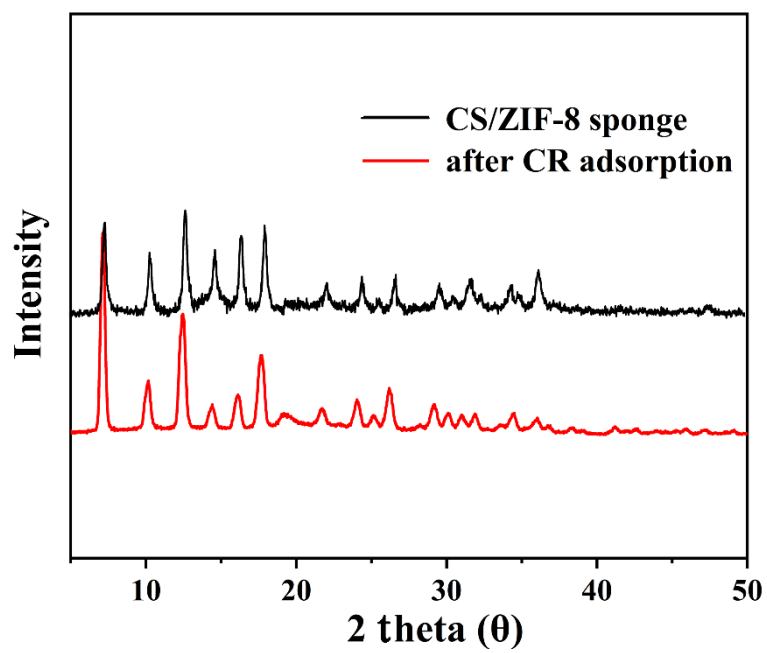

**Figure S5** PXRD patterns of ZIF-8@CS sponges before and after CR adsorption.

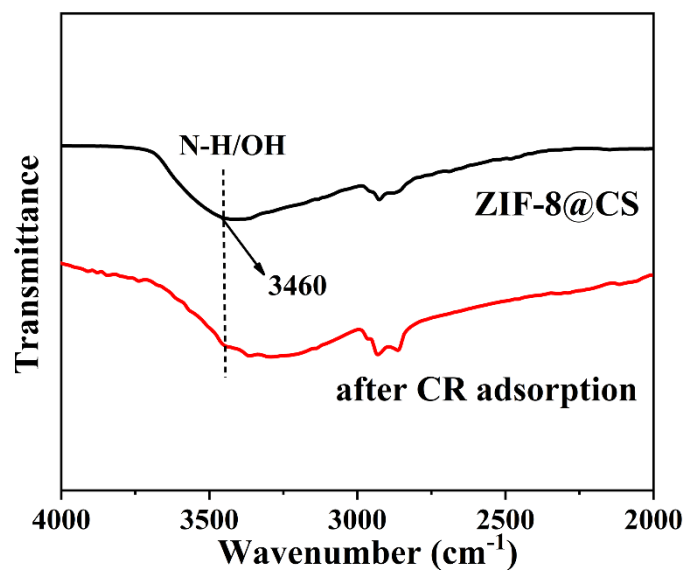

**Figure S6** FT-IR spectra of ZIF-8@CS sponges before and after CR adsorption.

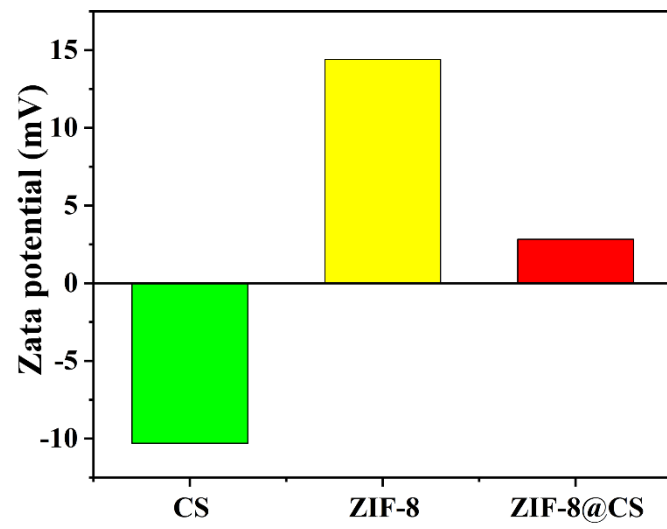

**Figure S7** Zeta potentials of different materials.



**Table S1** The adsorption kinetic fitting parameters.

|          | Pseudo-second-order model |       |                       | Pseudo-first-order model |       |                       |
|----------|---------------------------|-------|-----------------------|--------------------------|-------|-----------------------|
|          | $q_e$                     | $R^2$ | $K_2$                 | $q_e$                    | $R^2$ | $K_1$                 |
| CS       | 105.12                    | 0.98  | $3.31 \times 10^{-4}$ | 100.90                   | 0.76  | $1.11 \times 10^{-2}$ |
| ZIF-8    | 468.00                    | 0.99  | $4.70 \times 10^{-5}$ | 459.96                   | 0.97  | $1.32 \times 10^{-2}$ |
| ZIF-8@CS | 935.52                    | 0.97  | $8.96 \times 10^{-6}$ | 932.57                   | 0.91  | $1.48 \times 10^{-2}$ |

**Table S2** Langmuir, Freundlich and Langmuir-Freundlich Constants and Correlation Coefficients.

|          | Langmuir  |       |       | Freundlich |       |       | Langmuir-Freundlich |       |       |       |
|----------|-----------|-------|-------|------------|-------|-------|---------------------|-------|-------|-------|
|          | $q_{max}$ | $K_L$ | $R^2$ | $K_F$      | $n$   | $R^2$ | $q_{max}$           | $K_a$ | $n$   | $R^2$ |
| CS       | 273.24    | 0.013 | 0.996 | 5.145      | 1.254 | 0.934 | 344.72              | 0.009 | 0.948 | 0.999 |
| ZIF-8    | 726.77    | 0.050 | 0.991 | 64.253     | 1.792 | 0.968 | 546.83              | 0.089 | 1.459 | 0.999 |
| ZIF-8@CS | 1221.06   | 0.093 | 0.982 | 195.216    | 2.253 | 0.945 | 987.01              | 0.141 | 1.612 | 0.995 |

**Table S3** Langmuir Constants and Correlation Coefficients for CR adsorption upon ZIF-8@CS sponge at different temperature.

|       | $q_{max}$ (mg/g) | $K_L$ | $R^2$ |
|-------|------------------|-------|-------|
| 298 K | 1221.06          | 0.093 | 0.982 |
| 303 K | 1064.08          | 0.073 | 0.984 |
| 313 K | 791.86           | 0.052 | 0.968 |

**Table S4** Thermodynamic parameters of CR sorption by ZIF-8@CS sponge.

| $\Delta H$<br>(kJ mol <sup>-1</sup> ) | $\Delta G$ (kJ mol <sup>-1</sup> ) |       |       | $\Delta S$<br>(J mol <sup>-1</sup> k <sup>-1</sup> ) |
|---------------------------------------|------------------------------------|-------|-------|------------------------------------------------------|
|                                       | 298k                               | 308k  | 318k  |                                                      |
| -29.47                                | -8.54                              | -8.19 | -7.49 | -70.22                                               |
